# Supplementary material
Source: PubMed Central journal article supplement (PMC4003889)

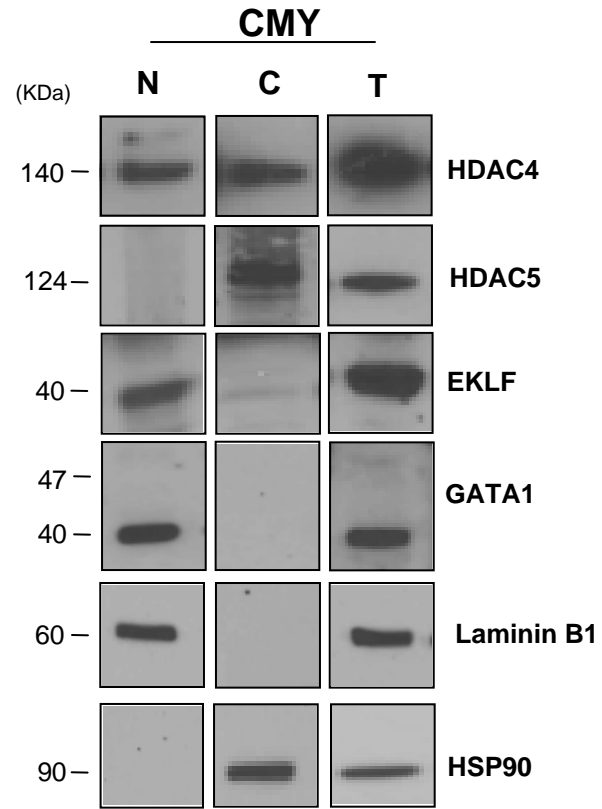

Supplemental Figure 1

Supplement: NIHMS572841-supplement-01.pdf [file NIHMS572841-supplement-01.pdf]

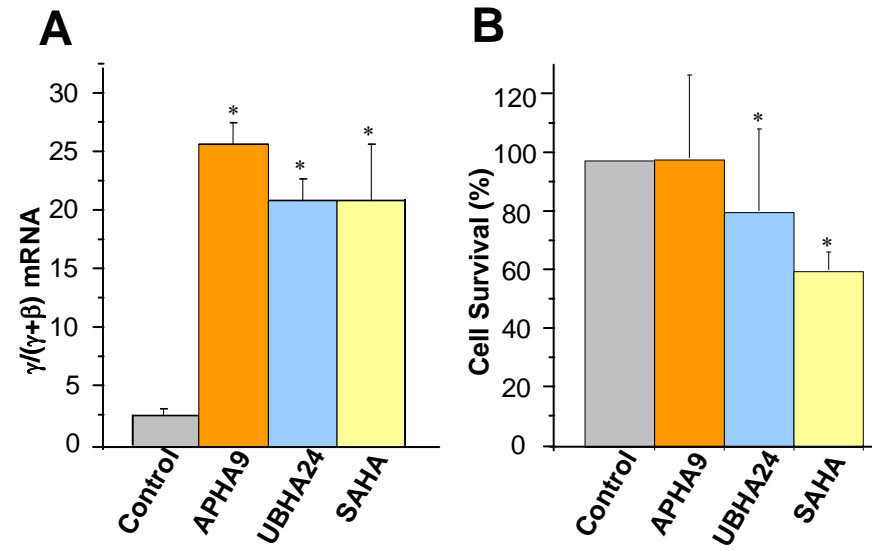

Supplemental Figure 2

Supplement: NIHMS572841-supplement-02.pdf [file NIHMS572841-supplement-02.pdf]
